# Supplementary material for: Blood flow guides sequential support of neutrophil arrest and diapedesis by PILR-β1 and PILR-α
Source: eLife. 2019 Aug 6;8:e47642. doi: 10.7554/eLife.47642 (PMC6699825; doi:10.7554/eLife.47642)
Supplement: Figure 5—source data 2. [file elife-47642-fig5-data2.csv]

Fig.5C-D
Coating
PILRa-Fc
cumulative adhesion
dyn/cm2	time (s)	ev#	% total by shear	ave	% max
0	1080	102.2373005	66.84714764	66.84714764	100
0.1	900	49.75588217	32.53253738	22.510305	48.6670539
0.1	840	29.73277751	19.44056971		29.08212302
0.1	780	23.79440769	15.55780791		23.27370496
0.2	720	6.959208791	4.550230249	4.62990433	6.806917586
0.2	660	4.840293455	3.164792199		4.734371339
0.2	600	9.443689299	6.174690543		9.237029194
0.3	540	6.200961815	4.054455739	4.8889304	6.065263638
0.3	480	7.943164813	5.193583048		7.769341297
0.3	420	8.287543125	5.418752412		8.106183439
0.5	360	2.037336323	1.33209818	1.123712626	1.992752462
0.5	300	2.037336323	1.33209818		1.992752462
0.5	240	1.081209819	0.706941518		1.057549264
1	180	0	0	0	0
raw specific total ev#	268
expt #	8
PILRb-Fc
cumulative adhesion
dyn/cm2	time (s)	ev#	% total by shear	ave	% max
0	1080	61.4545144	42.12864391	42.12864391	100
0.1	900	43.05232884	29.5134743	28.90056522	70.05560007
0.1	840	47.86133957	32.81017434		77.88091734
0.1	780	35.56110292	24.37804702		57.86572925
0.2	720	20.0925441	13.77395369	15.63899399	32.69498472
0.2	660	21.26587728	14.57830364		34.60425565
0.2	600	27.08100787	18.56472463		44.06675105
0.3	540	13.70999448	9.398552428	10.661457	22.30917389
0.3	480	15.39764202	10.55547805		25.0553473
0.3	420	17.54907507	12.03034051		28.55620167
0.5	360	1.950280763	1.336967424	2.670339882	3.173535389
0.5	300	4.571874218	3.134136895		7.439444054
0.5	240	5.163797295	3.539915327		8.40263298
1	180	0	0	0	0
raw specific total ev#	340
expt #	9
shear stress
dyn/cm2	time (s)
0	1080
0	1020
0	960
0	900
0.1	900
0.1	840
0.1	780
0.1	720
0.2	720
0.2	660
0.2	600
0.2	540
0.3	540
0.3	480
0.3	420
0.3	360
0.5	360
0.5	300
0.5	240
0.5	180
1	180
1	120
1	60
1	0
PILRaFc		fraction total
dyn/cm2	time (s)	ave	sem		p
0	1080	0.637017373	0.05787791		0.0174
0.1	900	0.344370475	0.041856541		0.2632
0.1	840	0.201097601	0.058493189		0.3055
0.1	780	0.153215695	0.047054619		0.3477
0.2	720	0.04479686	0.01587119		0.1367
0.2	660	0.032001764	0.016182814		0.0197
0.2	600	0.067413205	0.03651602		0.0979
0.3	540	0.048371034	0.021600375		0.1925
0.3	480	0.05801499	0.023016528		0.1597
0.3	420	0.106974644	0.045559871		0.789
0.5	360	0.014649639	0.011283787		0.9009
0.5	300	0.014649639	0.011283787		0.3249
0.5	240	0.003392333	0.003392333		0.1928
1	180	0	0		1
PILRbFc		fraction total
dyn/cm2	time (s)	ave	sem
0	1080	0.403397451	0.064383781
0.1	900	0.264005396	0.05342088
0.1	840	0.292829765	0.062736435
0.1	780	0.212809391	0.040147631
0.2	720	0.146735111	0.059257963
0.2	660	0.161499057	0.044368989
0.2	600	0.186507846	0.054600273
0.3	540	0.09728195	0.027761165
0.3	480	0.112824054	0.028267525
0.3	420	0.126112351	0.05233132
0.5	360	0.013040034	0.006585804
0.5	300	0.083243344	0.062521517
0.5	240	0.092919349	0.061594532
1	180	0	0
PILRaFc	fraction total by shear
dyn/cm2	ave	sem	p
0	0.637017373	0.05787791	0.0174
0.1	0.232894591	0.042273182	0.6968
0.2	0.04807061	0.015820305	0.0015
0.3	0.071120223	0.025537006	0.2676
0.5	0.010897204	0.007781838	0.2524
1	0	0	1
PILRbFc	fraction total by shear
dyn/cm2	ave	sem
0	0.403397451	0.064383781
0.1	0.256548184	0.041699673
0.2	0.164914005	0.024538983
0.3	0.112072785	0.024680046
0.5	0.063067576	0.040593668
1	0	0
PILRa-Fc	abs #
dyn/cm2	ave	sem	p
0	12.77966257	4.944969616	0.2608
0.1	4.30346114	1.336201181	0.8282
0.2	0.885132981	0.278029076	0.0377
0.3	0.934652906	0.295722828	0.241
0.5	0.214828436	0.14675696	0.4678
1	0	0	1
PILRb-Fc	abs #
dyn/cm2	ave	sem
0	6.828279378	1.965230121
0.1	4.68425079	1.111779082
0.2	2.534793676	0.633929465
0.3	1.728026354	0.551913186
0.5	0.432813047	0.242450336
1	0	0
