# Supplementary material for: Blood flow guides sequential support of neutrophil arrest and diapedesis by PILR-β1 and PILR-α
Source: eLife journal article supplement (doi:10.7554/elife.47642), 2019-08-06
Supplement: figures [file elife-47642-figures-v2.pdf]

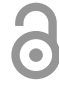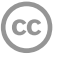

---

## Figures and figure supplements

Blood flow guides sequential support of neutrophil arrest and diapedesis by PILR- $\beta$  1 and PILR- $\alpha$

**Yu-Tung Li *et al***

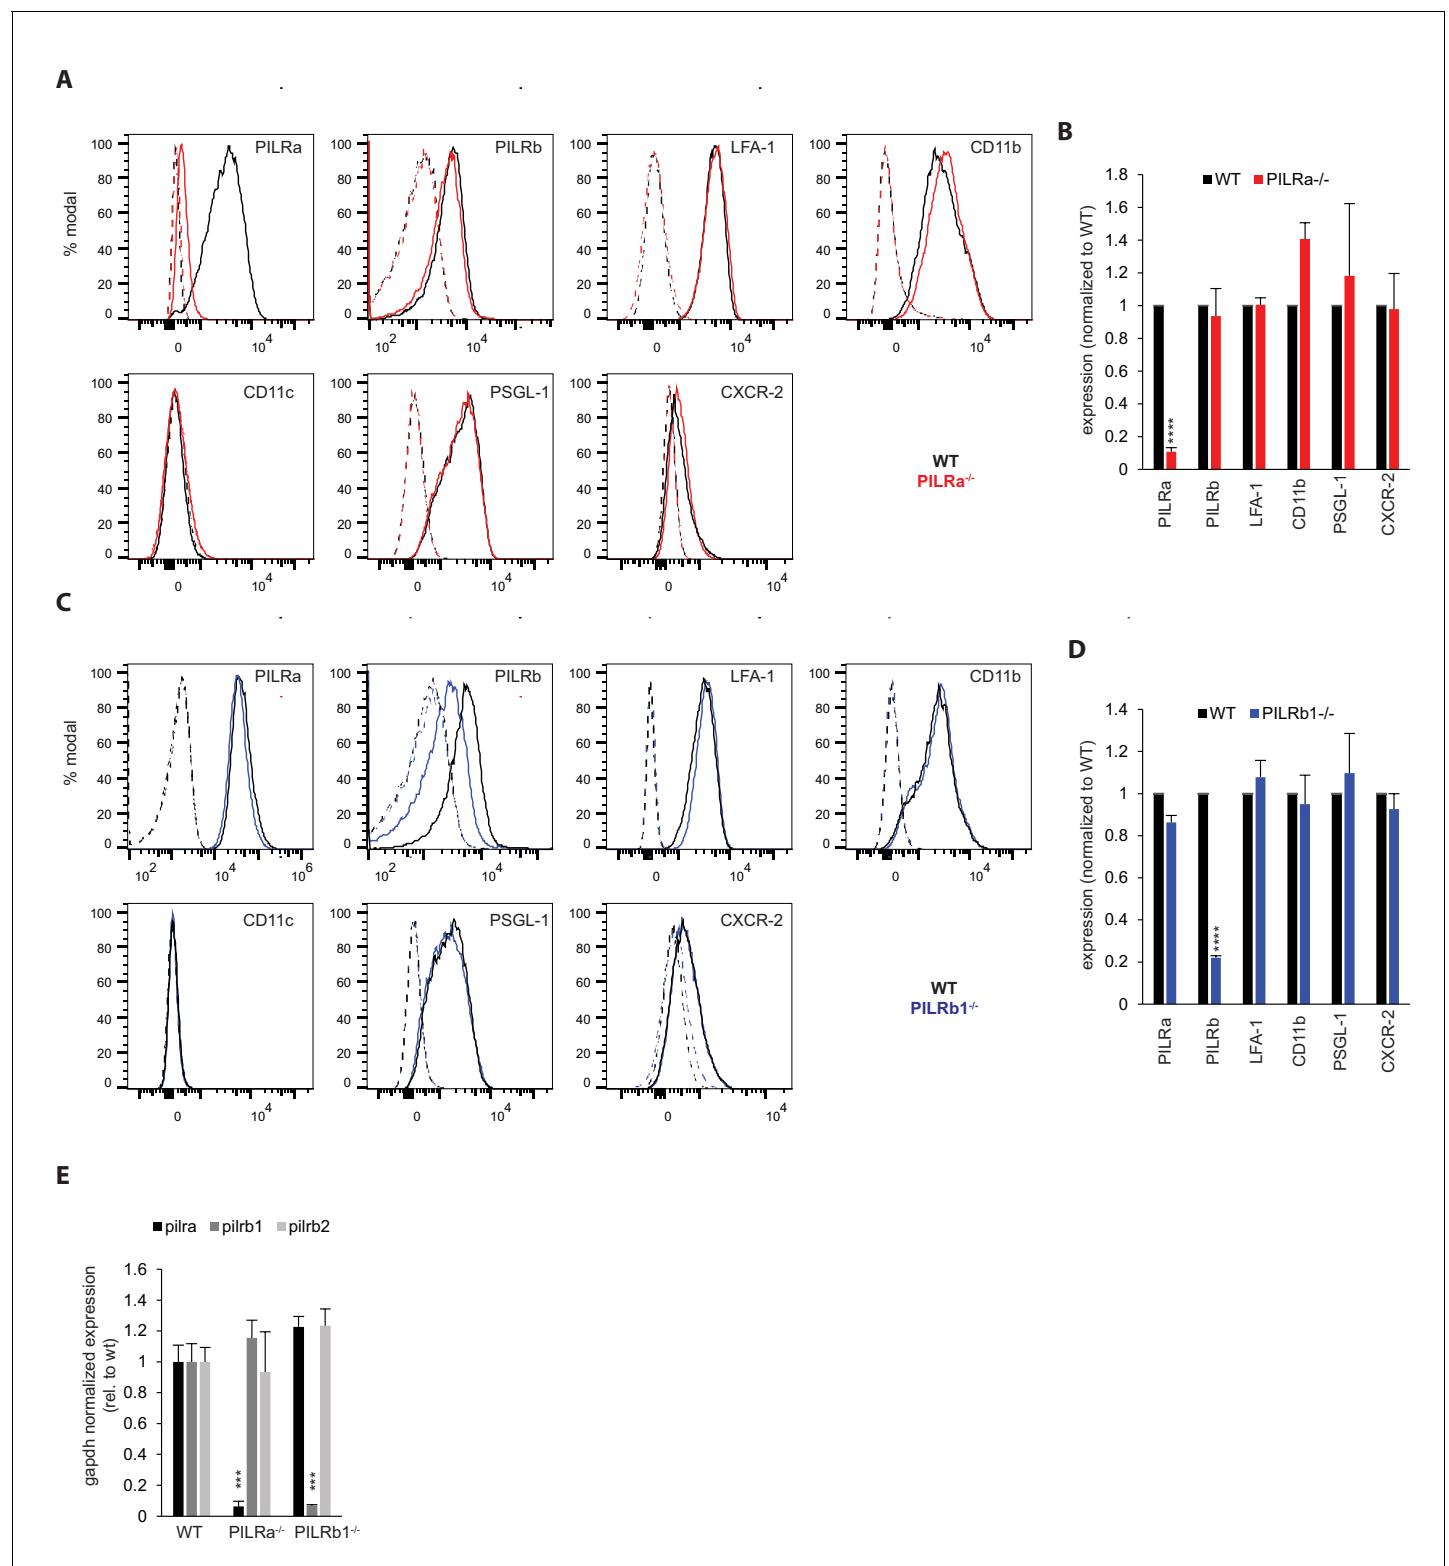

**Figure 1.** Characterization of PILR- $\alpha^{-/-}$  and PILR- $\beta 1^{-/-}$  neutrophils for surface expression of molecules involved in extravasation. Ly6G<sup>+</sup> bone marrow neutrophils from WT, PILR- $\alpha^{-/-}$  or PILR $\beta 1^{-/-}$  mice were analyzed for indicated antigens by FACS. Representative histograms of at least three independent experiments are shown in (A) for PILR- $\alpha^{-/-}$  and (C) for PILR- $\beta 1^{-/-}$  mice, with expression levels quantified in (B) and (D), respectively. Solid tracks, specific staining; dotted tracks, isotype control. Groups were compared by 2-tailed t-test. (E) qRT-PCR analysis of RNA extracted from peripheral blood of WT

Figure 1 continued on next page

*Figure 1 continued*

(n = 9) or PILR- $\alpha^{-/-}$  (n = 5) or PILR- $\beta 1^{-/-}$  (n = 7) mice for the indicated genes. Groups were analyzed by 1-way ANOVA followed by Holm-Sidak method for multiple comparisons. Error bars, SEM. \*\*\*\*p<0.001.

DOI: <https://doi.org/10.7554/eLife.47642.002>

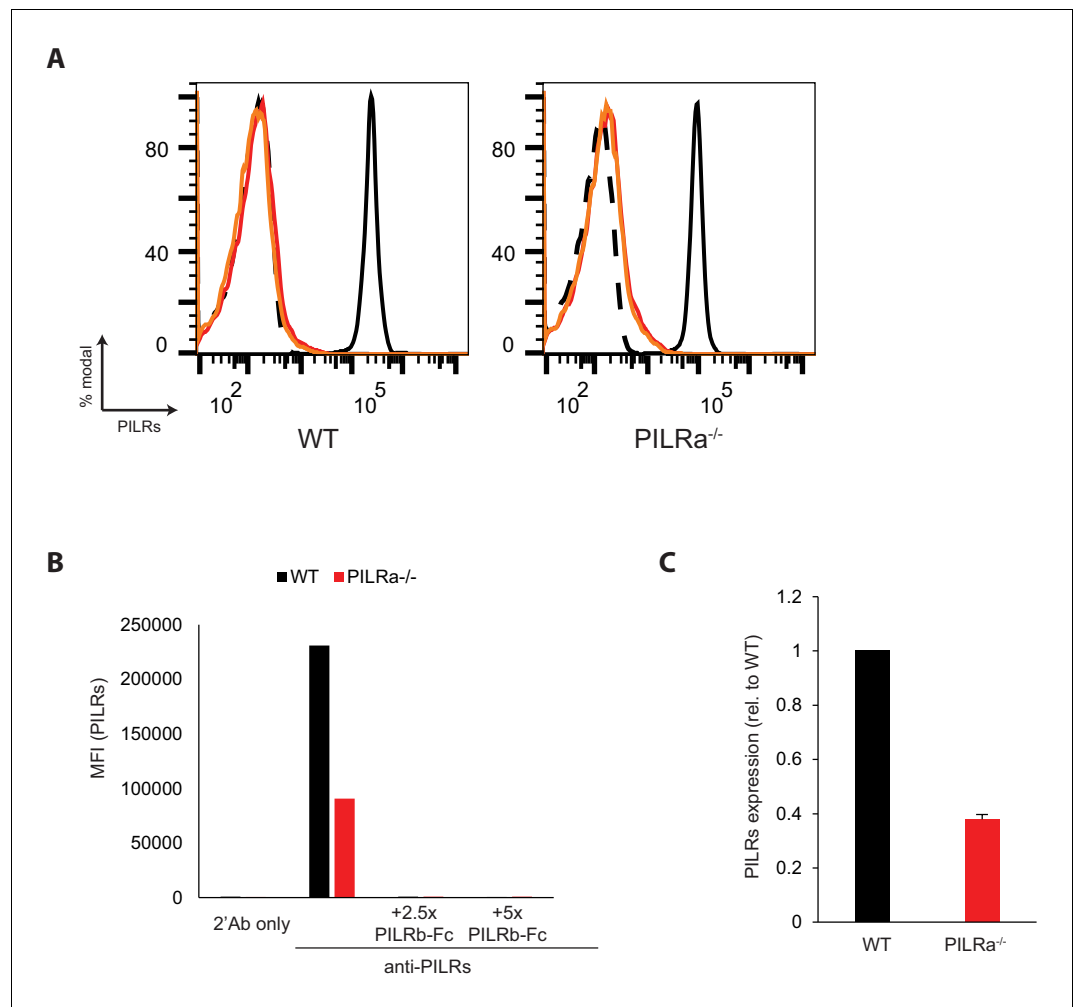

**Figure 1—figure supplement 1.** Quantification of PILR subtypes in neutrophils. (A) Ly6G<sup>+</sup> WT and  $PILR\alpha^{-/-}$  bone marrow cells were stained with a primary antibody recognizing both PILR- $\alpha$  and PILR- $\beta$  in the absence (black) or presence of 2.5-fold (red) or 5-fold (orange) excess of blocking PILR- $\beta$ -Fc. Dotted black line: secondary antibody only, solid black line: without blocking PILR- $\beta$ -Fc. (B) MFI quantification of PILR signals in (A). (C) Quantification of PILR signal on WT and  $PILR\alpha^{-/-}$  Ly6G<sup>+</sup> cells from two experiments.

DOI: <https://doi.org/10.7554/eLife.47642.003>

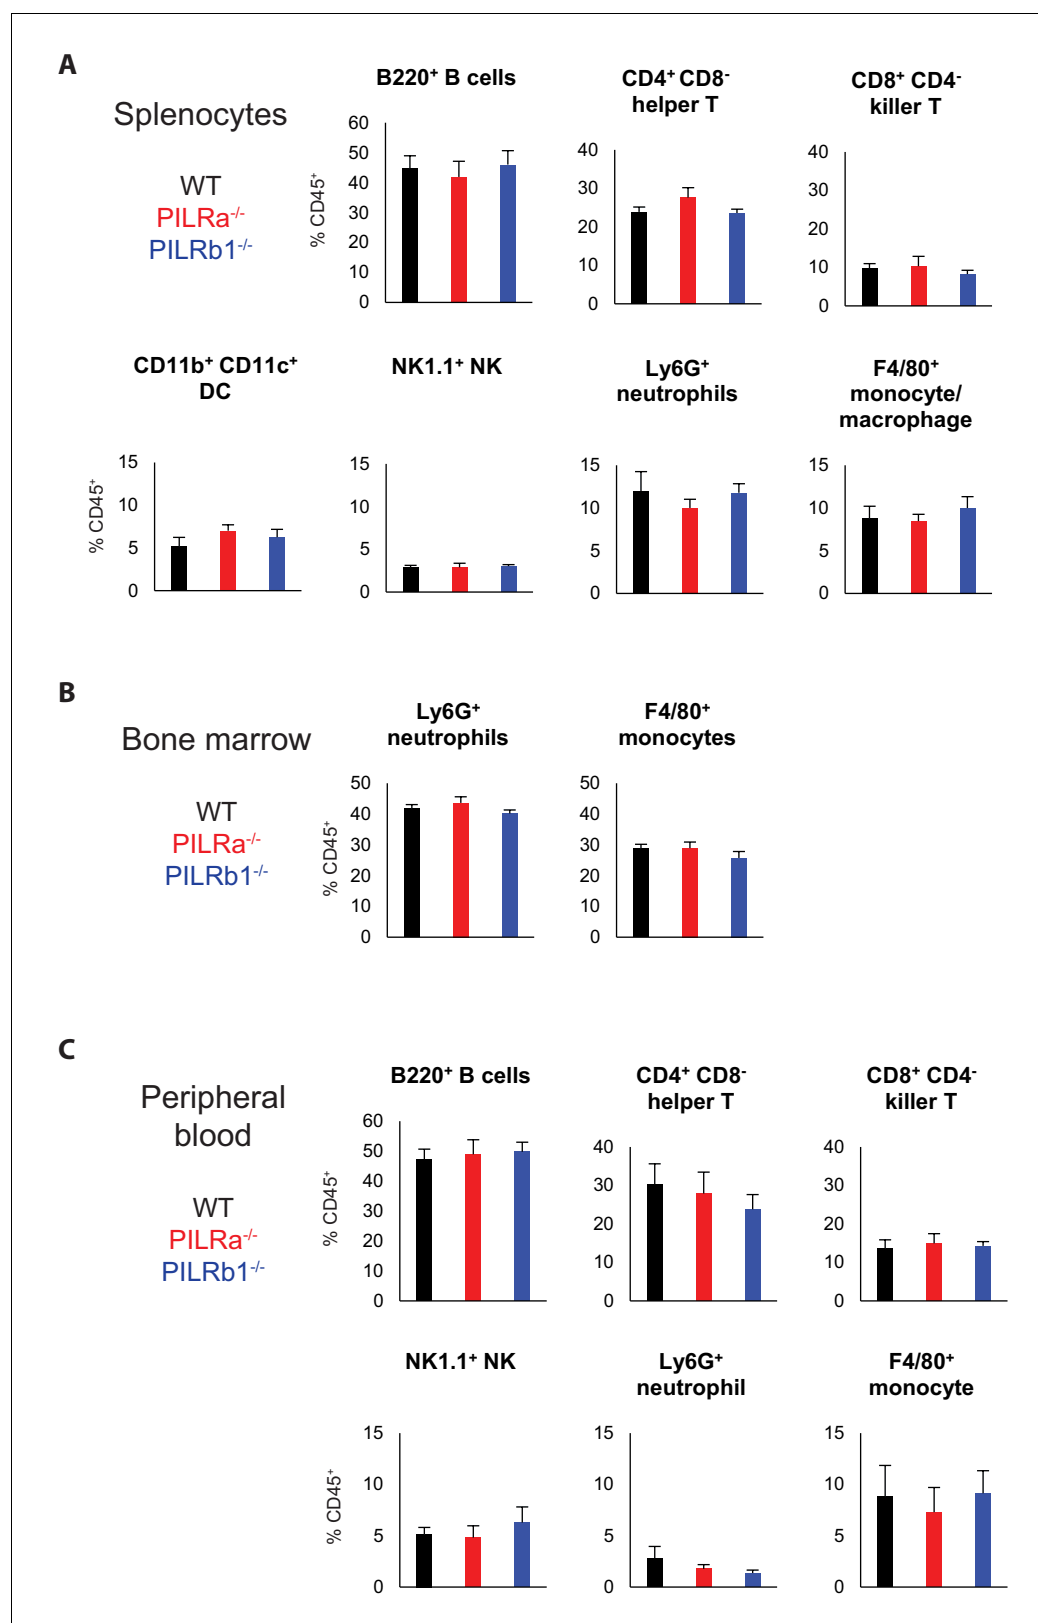

**Figure 1—figure supplement 2.** Characterization of immune subsets in PILR- $\alpha^{-/-}$  and PILR- $\beta 1^{-/-}$  mice. WT (black), PILR- $\alpha^{-/-}$  (red) and PILR- $\beta 1^{-/-}$  (blue) CD45<sup>+</sup> leukocytes from spleen (A), bone marrow (B) or peripheral blood (C)

Figure 1—figure supplement 2 continued on next page

*Figure 1—figure supplement 2 continued*

were stained by antibodies against the indicated antigens and analyzed by flow cytometry. Results are from at least three mice per genotype.

DOI: <https://doi.org/10.7554/eLife.47642.005>

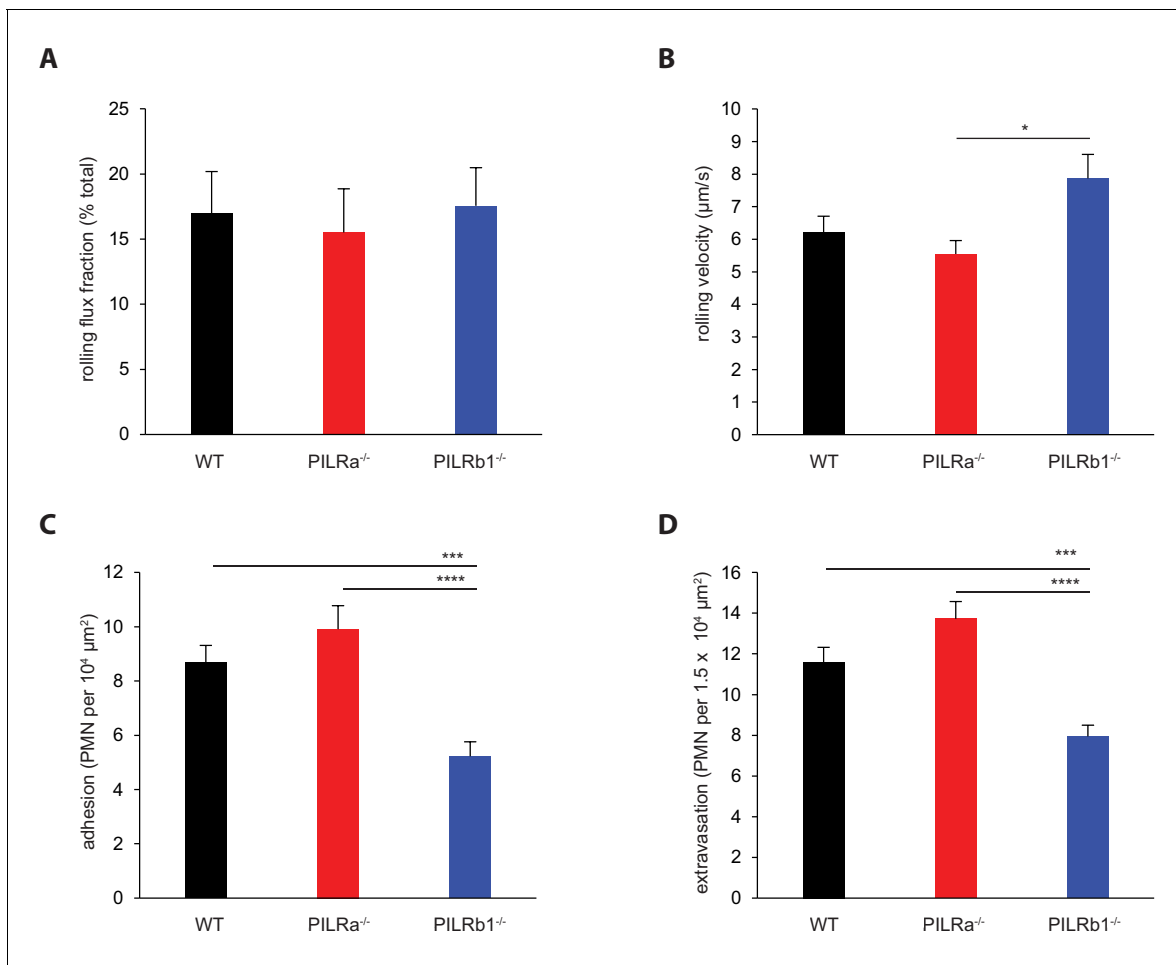

**Figure 2.** Impact of PILRs on neutrophil extravasation in the inflamed cremaster. WT, PILR- $\alpha^{-/-}$  and PILR- $\beta 1^{-/-}$  mice were stimulated with intrascrotal TNF- $\alpha$  for 2 hr. Cremaster muscles were exposed and examined for neutrophil extravasation by intravital microscopy (IVM) for (A) rolling flux fraction, (B) rolling velocity, (C) adherent leukocytes, and (D) extravasated leukocytes. WT: n = 40 vessels from eight mice; PILR- $\alpha^{-/-}$ : n = 37 vessels from seven mice; PILR- $\beta 1^{-/-}$ : n = 35 vessels from seven mice. For (B), 117 cells (WT), 111 cells (PILR- $\alpha^{-/-}$ ) and 105 cells (PILR- $\beta 1^{-/-}$ ) from the indicated number of vessels were quantified. Groups were analyzed by 1-way ANOVA followed by Tukey's multiple comparisons. Error bars, SEM. \*p<0.05, \*\*\*p<0.005, \*\*\*\*p<0.001. Hemodynamic parameters are given in **Table 1**.

DOI: <https://doi.org/10.7554/eLife.47642.012>

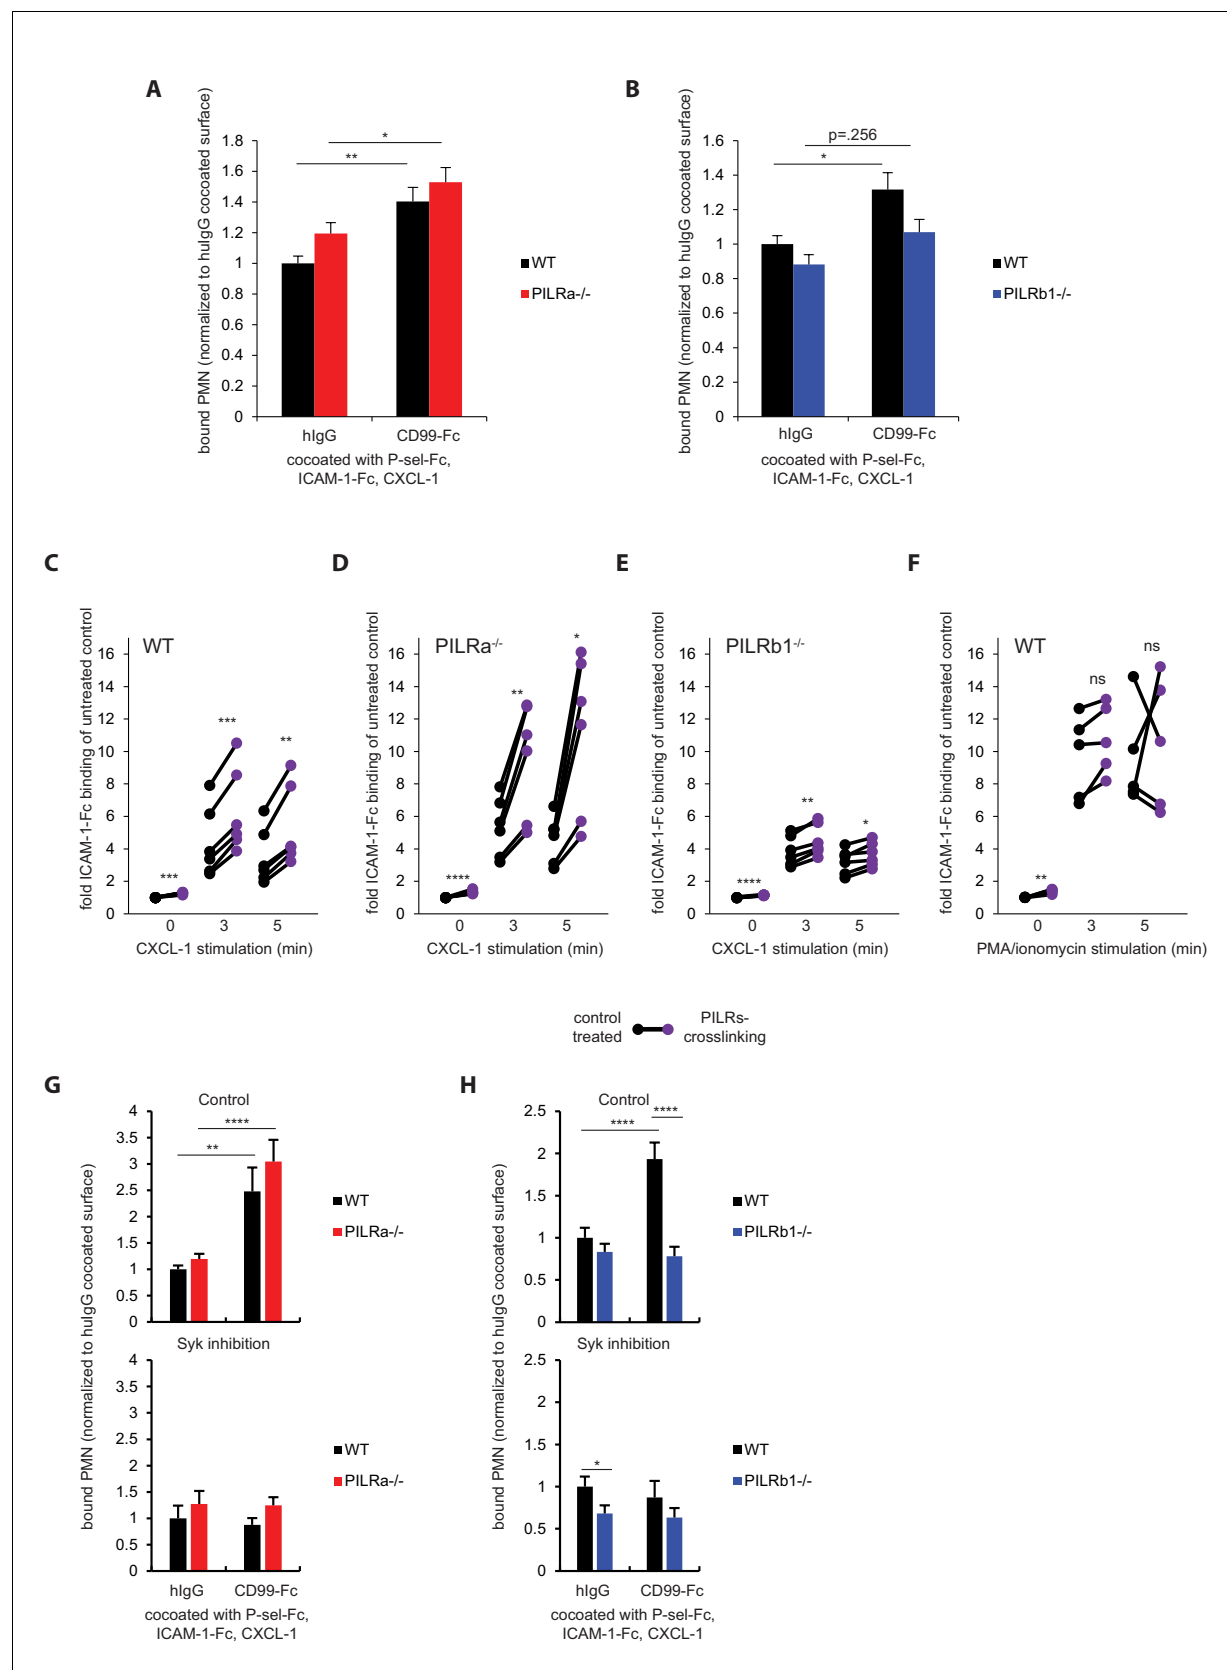

**Figure 3.** PILR- $\beta 1$  is required for CD99-stimulated neutrophil adhesion on ICAM-1-Fc in vitro. Flow chamber surfaces were coated with P-selectin-Fc, ICAM-1-Fc and CXCL-1, and co-coated with either CD99-Fc or human IgG1 control (hlgG). PILR- $\alpha^{-/-}$  (A) or PILR- $\beta 1^{-/-}$  (B) PMN were mixed with

Figure 3 continued on next page



*Figure 3 continued*

fluorescently labeled WT PMN in 1:1 ratio and passed over the surfaces at 5 dyn/cm<sup>2</sup> at 37°C for 5 min. Adherent PMNs were quantified for n = 45 fields from nine experiments each. (C–E) Bone marrow cells from WT (C), PILR- $\alpha^{-/-}$  (D) or PILR- $\beta 1^{-/-}$  (E) mice were mixed with ICAM-1-Fc/PE-conjugated secondary antibody detection complex. Cell mixtures were pre-treated with non-crosslinking rabbit IgG or crosslinking polyclonal anti-PILRs in pair for 15 min, and then stimulated with 100 ng/ml CXCL-1 for 0 min (unstimulated), 3 and 5 min, followed by fixation and analysis for ICAM-1-Fc binding to Ly6G<sup>+</sup> cells by FACS. n = 6 paired samples per treatment per genotype. (F) Experiment described in (C) was repeated except for replacing the chemokine stimulation by 20 ng/ml PMA + 1  $\mu$ g/ml ionomycin. n = 5 paired samples per treatment. (G–H) Experiments described in (A–B) were repeated in the presence of 1  $\mu$ M Syk inhibitor PRT-060318 or vehicle control with PILR- $\alpha^{-/-}$  (G) or PILR- $\beta 1^{-/-}$  (H) neutrophils. n = 26 fields each from two experiments (G, control) or 39 fields each from three experiments (G, inhibition) fields. n = 20 fields each from two experiments (H, control) or 30 fields each from three experiments (H, inhibition) fields. Groups were compared by 1-way ANOVA followed by Tukey's multiple comparisons in (A, B, G, H) or 2-tailed paired t-test in (C–F). Error bars, SEM. \*p<0.05, \*\*p<.005, \*\*\*p<0.0005, \*\*\*\*p<0.0001.

DOI: <https://doi.org/10.7554/eLife.47642.020>

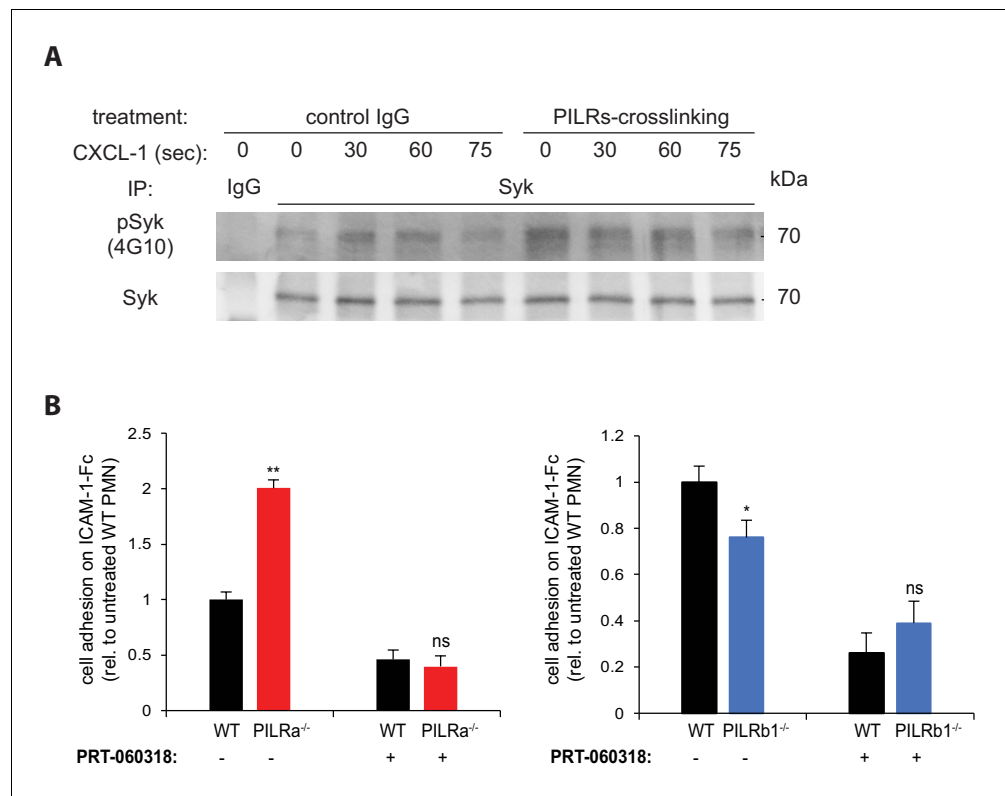

**Figure 3—figure supplement 1.** PILRs modulate  $\beta 2$  integrin activity via Syk. (A) PMN were pre-treated with non-crosslinking rabbit IgG or crosslinking polyclonal anti-PILRs for 15 min, and then stimulated with 100 ng/ml CXCL-1 for 0 s (unstimulated), 30 s, 60 s and 75 s, followed by fixation and cell lysis. Syk was immunoprecipitated and analyzed for phospho-Syk (4G10). (B) PMNs from WT (black), PILR- $\alpha^{-/-}$  (red) or PILR- $\beta 1^{-/-}$  (blue) were treated with or without 1  $\mu$ M Syk-inhibitor PRT-060318 for 30 min. Cells were allowed to adhere to ICAM-1-Fc coated surfaces in the presence of 100 ng/ml CXCL-1 with or without PRT-060318. Adherent cells were counted.  $n \geq 12$  for each genotype from at least two experiments. Error bars, SEM. Groups were compared by 2-tailed t-test. ns, not significant, \* $p < 0.05$ , \*\* $p < 0.01$ .

DOI: <https://doi.org/10.7554/eLife.47642.021>

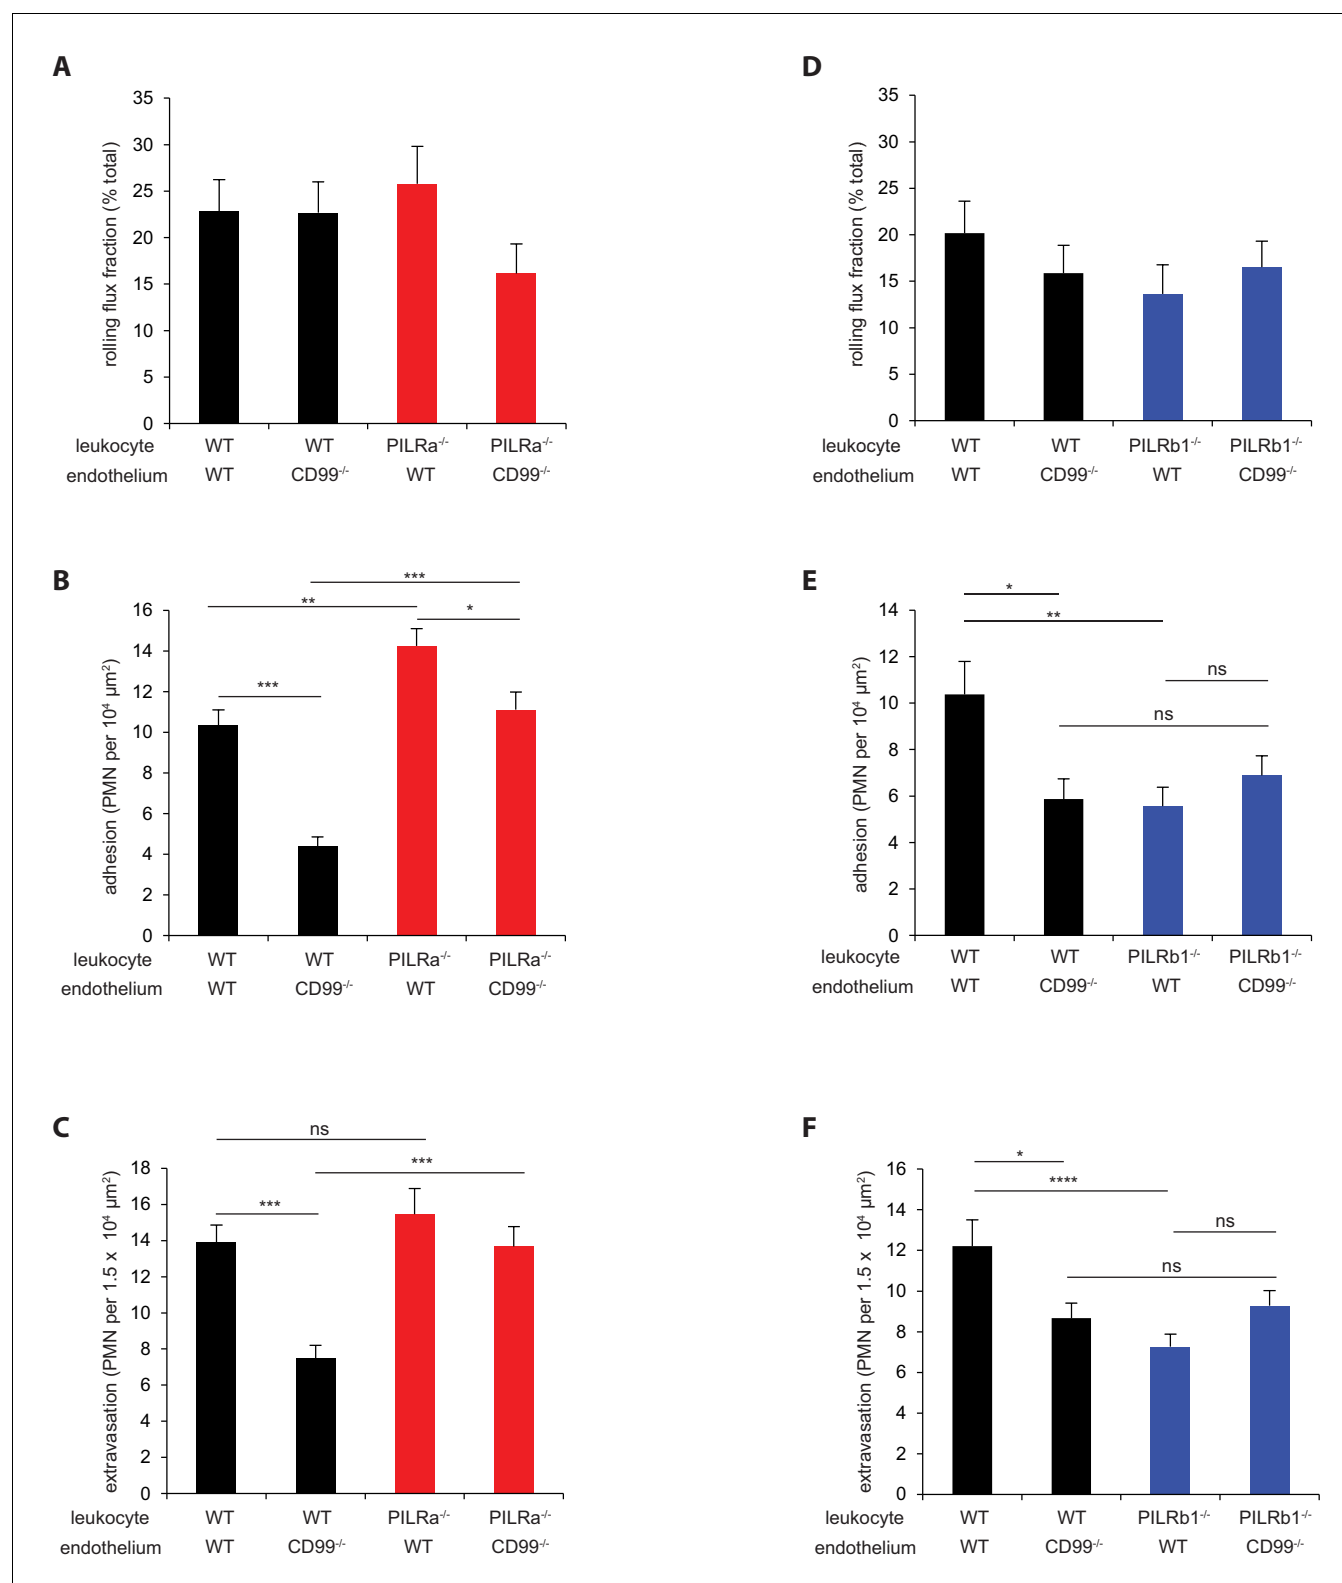

**Figure 4.** PILR-β1, but not PILR-α, is essential for CD99-stimulated support of neutrophil adhesion in vivo. WT or CD99<sup>-/-</sup> mice received bone marrow transplantation from WT (A–F) or PILR-α<sup>-/-</sup> (A–C) or PILR-β1<sup>-/-</sup> (D–F). IVM measurement of (A, D) rolling flux fraction, (B, E) adhesion and (C, F) extravasation were performed on TNF-α inflamed cremasters of the chimeric mice. Donor-Recipient: For (A–C), WT-WT, n = 39 vessels from five mice; WT-CD99<sup>-/-</sup>, n = 38 vessels from five mice; PILR-α<sup>-/-</sup>-WT, n = 39 vessels from five mice; PILR-α<sup>-/-</sup>-CD99<sup>-/-</sup>, n = 34 vessels from four mice. For (D–F), WT-WT, n = 23 vessels from four mice; WT-CD99<sup>-/-</sup>, n = 28 vessels from five mice; PILR-β1<sup>-/-</sup>-WT, n = 29 vessels from five mice; PILR-β1<sup>-/-</sup>-CD99<sup>-/-</sup>, n = 36

Figure 4 continued on next page

Figure 4 continued

vessels from five mice. Groups were analyzed by 1-way ANOVA followed by Tukey's multiple comparisons. Error bars, SEM. \* $p < 0.05$ , \*\* $p < 0.01$ , \*\*\* $p < 0.005$ . Hemodynamic parameters are given in **Tables 2** and **3**.

DOI: <https://doi.org/10.7554/eLife.47642.031>

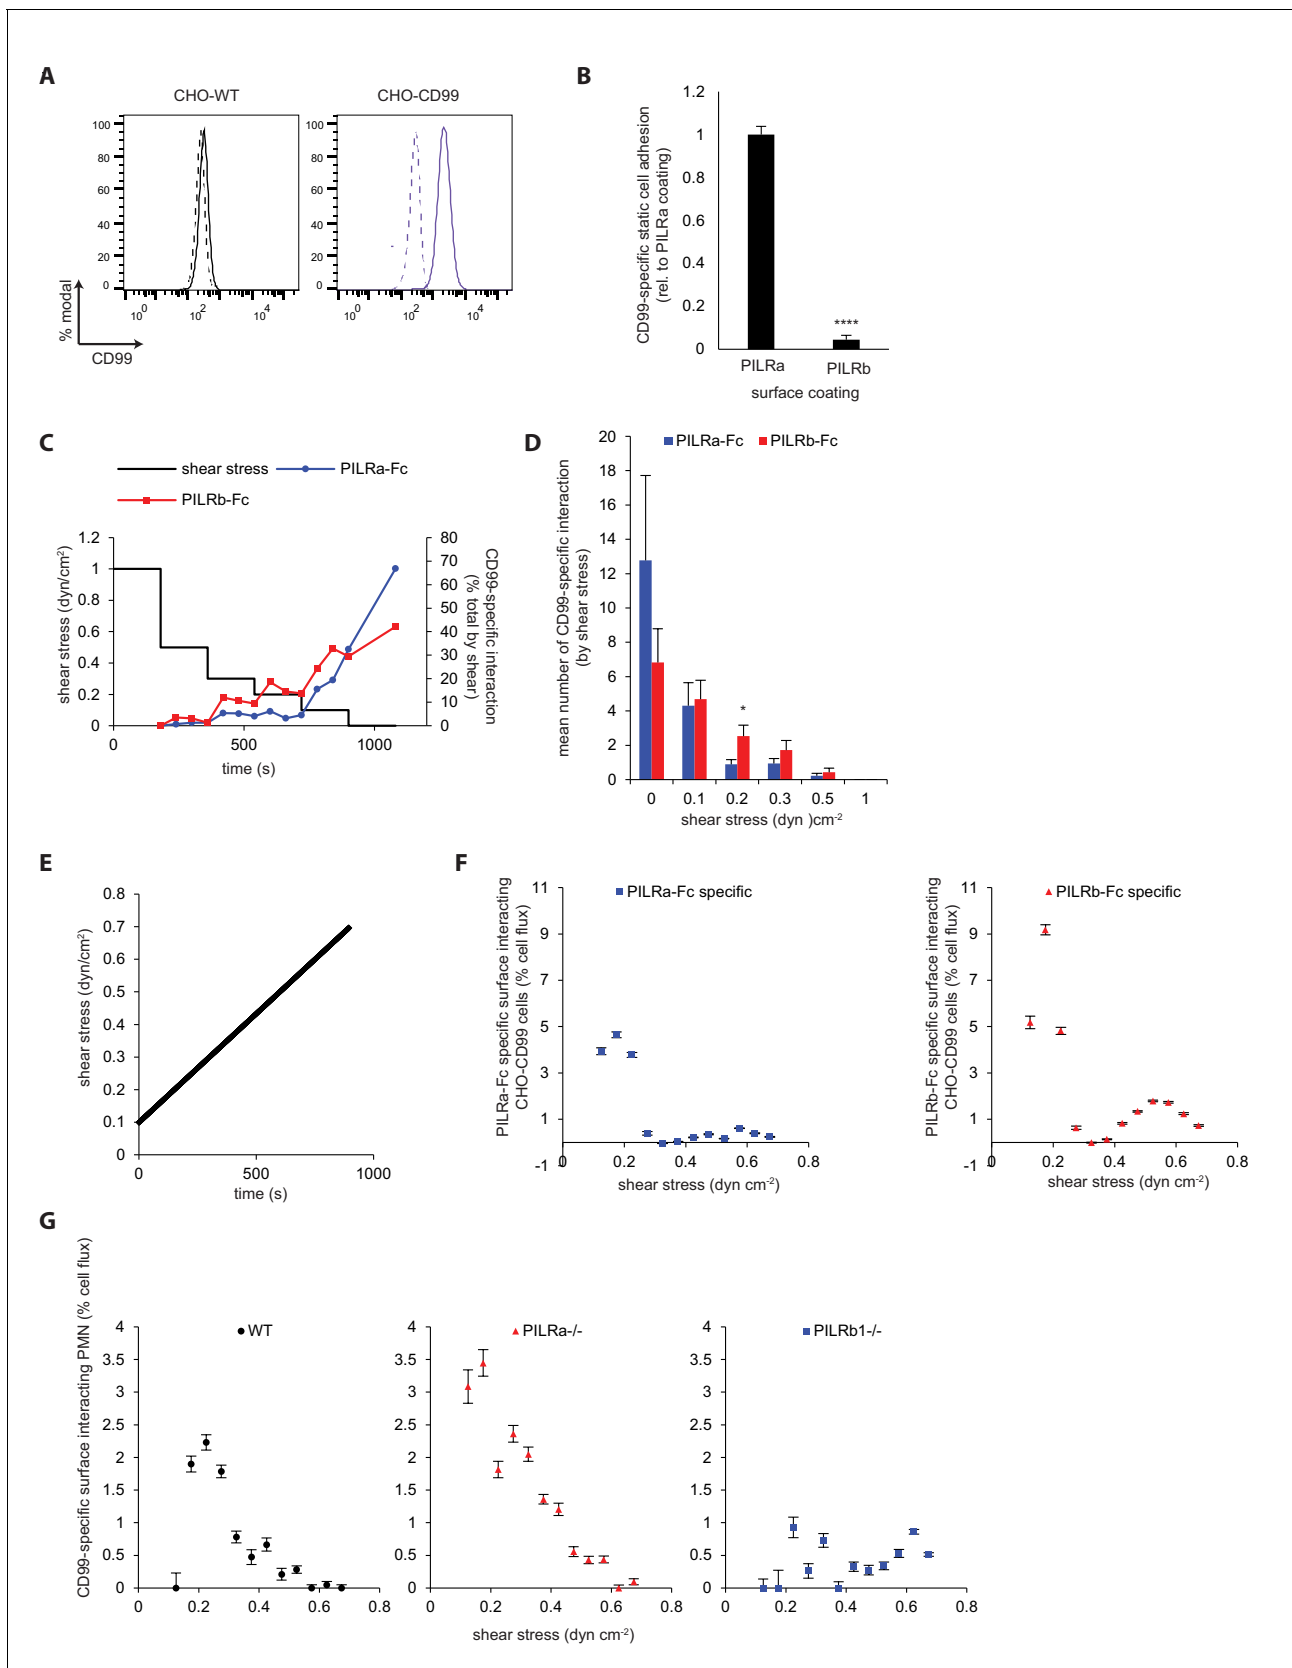

**Figure 5.** Shear stress enhances the interaction of CD99 with PILR- $\beta$ . (A) CHO cells overexpressing CD99 (CHO-CD99) were constructed and analyzed for surface expression of CD99. Solid tracks, anti-CD99; dotted tracks, secondary antibody only. (B) 1:1 Cell mixtures of CHO and CHO-CD99 were

Figure 5 continued on next page

*Figure 5 continued*

allowed to adhere onto PILR- $\alpha$ -Fc or PILR- $\beta$ -Fc coated surface at RT for 10 min (static conditions). CD99-specific cell adhesion was quantified.  $n = 30$  fields from six experiments. (C) 1:1 Cell mixtures of CHO and CHO-CD99 were passed over flow chamber surfaces coated with PILR- $\alpha$ -Fc (blue) or PILR- $\beta$ -Fc (red) at RT under stepped shear stress of 3 min interval each (black) and video recorded. CD99-specific cell-surface interactions ( $\geq 2$  s) were counted every minute. (D) Mean number of CD99-specific interactions under the indicated shear stress (from C) were quantified.  $n = 8$  experiments on PILR- $\alpha$ -Fc coating,  $n = 9$  experiments on PILR- $\beta$ -Fc coating. (E, F) CHO-CD99 were passed over a surface coated with PILR- $\alpha$ -Fc (blue), PILR- $\beta$ -Fc (red) or an uncoated control surface under increasing shear stress and video recorded. Transiently interacting ( $\geq 50$  ms) cells were counted and averaged from six experiments for determining fraction of PILR-specific interacting cell flux. (G) Experiment described as in (E, F) was repeated by passing WT (black), PILR- $\alpha^{-/-}$  (red) and PILR- $\beta 1^{-/-}$  (blue) PMNs through CD99-Fc or control hlgG coated flow chambers. Transiently interacting ( $\geq 30$  ms) neutrophils were counted and averaged from four experiments for determining the fraction of CD99-specific cell flux interactions.  $n = 75$  measurements per  $0.05 \text{ dyn/cm}^2$  interval for (E–G). Groups were compared by Mann-Whitney U-test in (B) and 2-tailed t-test in (D). Error bars, SEM. \* $p < 0.05$ , \*\*\* $p < .005$ , \*\*\*\* $p < 0.001$ .

DOI: <https://doi.org/10.7554/eLife.47642.038>

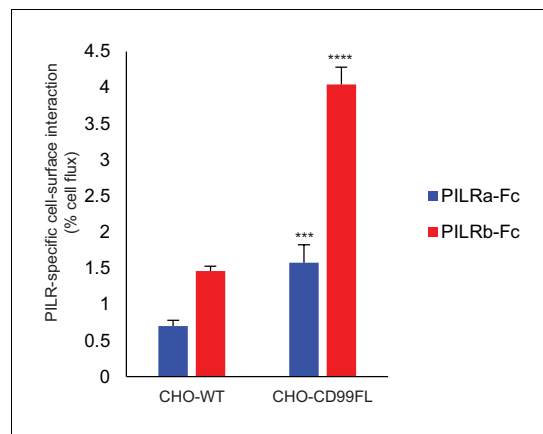

**Figure 5—figure supplement 1.** CD99-specific interaction with coated PILR-Fc under constant flow. Parental CHO cells (CHO-WT) or CHO cells expressing full-length CD99 (CHO-CD99FL) were passed over a surface coated with PILR- $\alpha$ -Fc (blue) or PILR- $\beta$ -Fc (red), or over an uncoated control surface at a constant shear stress of 0.2 dyn/cm<sup>2</sup> at room temperature for 3 min. Videos were recorded at one frame-per-second. Transiently interacting ( $\geq 50$  ms) cells were counted and averaged from three experiments per genotype per coating for determining the fraction of PILR-specific cell flux interactions.  $n = 180$  frames per flow. Groups were compared against CHO-WT by Mann-Whitney U-test. \*\*\* $p < .005$ , \*\*\*\* $p < 0.001$ .

DOI: <https://doi.org/10.7554/eLife.47642.039>

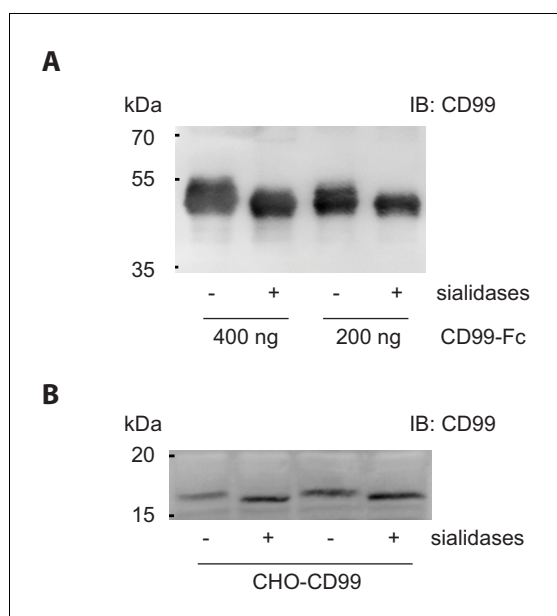

**Figure 5—figure supplement 2.** CD99-Fc and full-length CD99 produced in CHO cells are glycosylated. (A) CD99-Fc was treated with 0 or 0.3 U/ml sialidase at 37°C for 1 hr and analyzed by Western blot. (B) CHO-CD99 was similarly treated with sialidase. Lysate was prepared and analyzed by Western blot.

DOI: <https://doi.org/10.7554/eLife.47642.041>



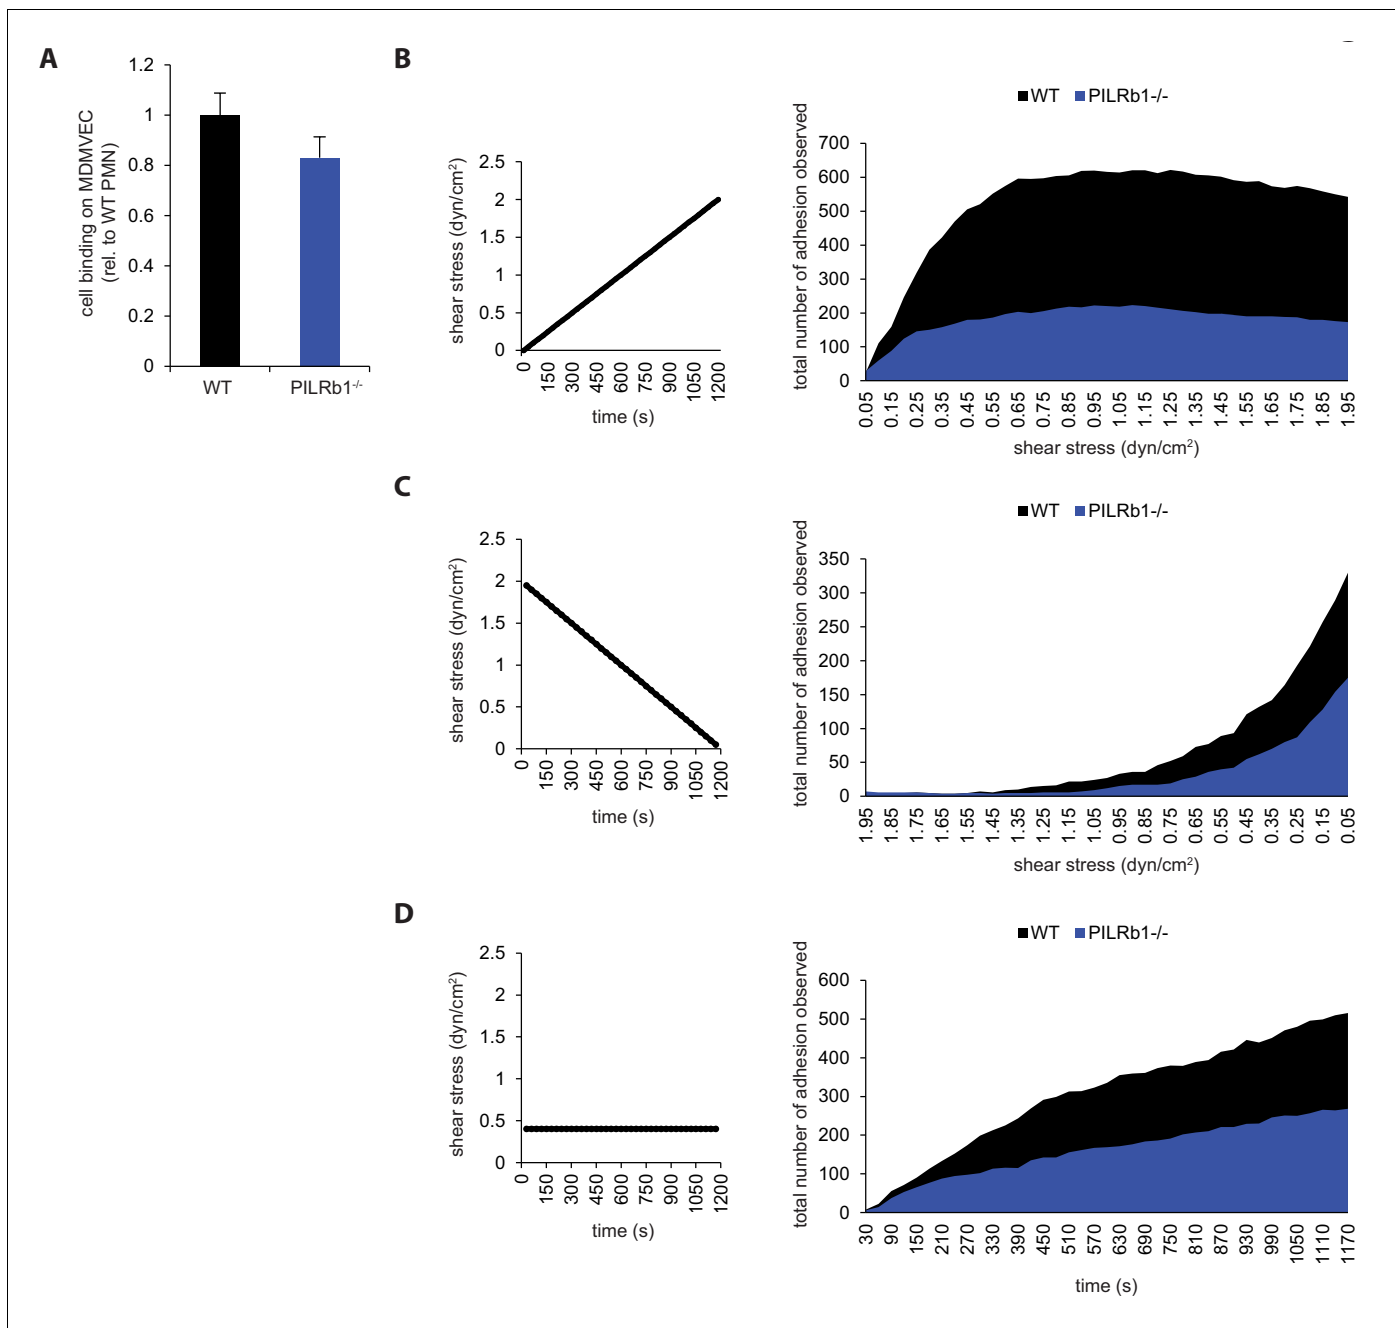

**Figure 6.** Shear switches on PILR-β1-stimulated adhesion of neutrophils to endothelial monolayers under flow. (A) PMN from WT or PILR-β1<sup>-/-</sup> mice were allowed to adhere onto TNF-α inflamed and CXCL-1 pretreated MDMVEC under stasis. Adherent cells were counted.  $n = 17$  fields per genotype from two experiments. Groups were compared by 2-tailed t-test. Error bars, SEM. (B–D) PMN from WT or PILR-β1<sup>-/-</sup> mice were passed under increasing flow over TNF-α inflamed and CXCL-1 pretreated MDMVEC monolayer under an increasing shear gradient (B) or a shear gradient from 2 to 0 dyn/cm<sup>2</sup> (C) or a constant shear at 0.4 dyn/cm<sup>2</sup> (D) in 20 min with adhesion events (C) being pooled from five experiments (B, C) or four experiments (D) for each genotype under different shear stresses.

DOI: <https://doi.org/10.7554/eLife.47642.047>

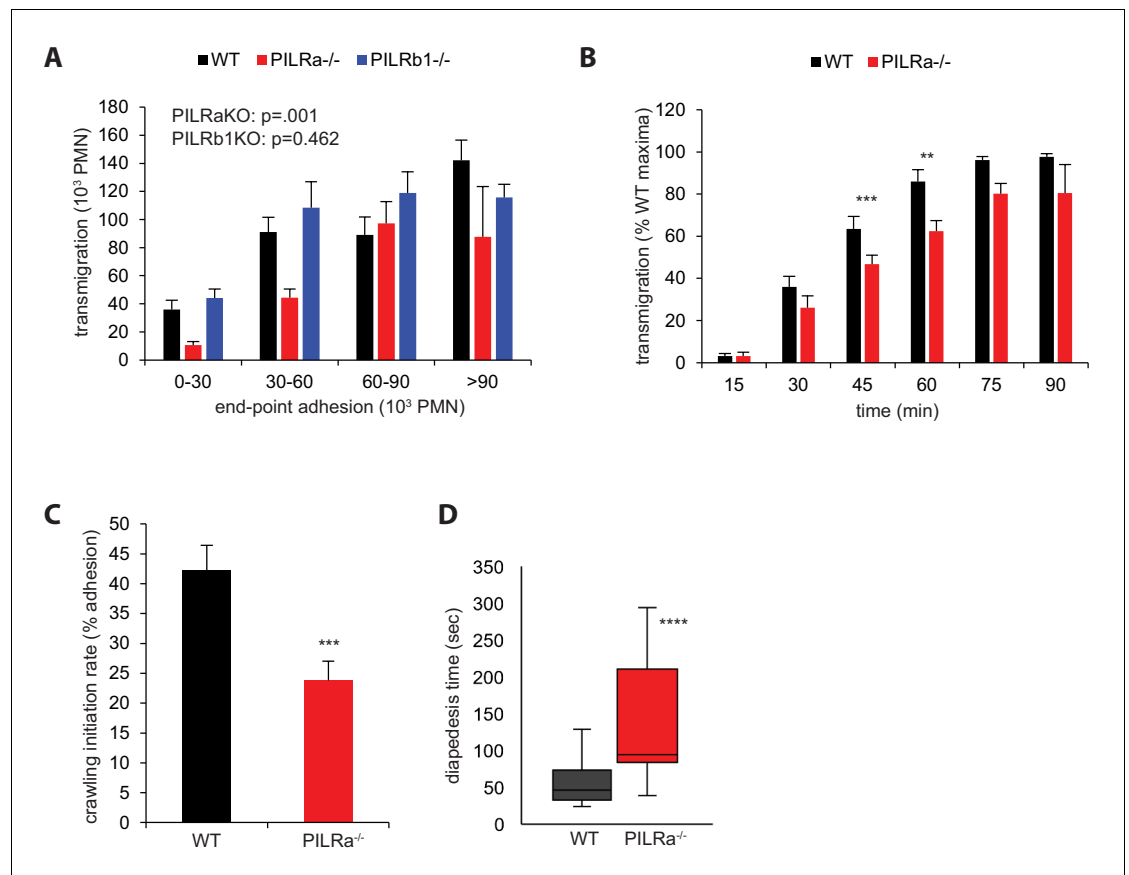

**Figure 7.** PILR- $\alpha$  supports crawling and diapedesis. (A) Correlation between adhesion and transmigration of WT, PILR- $\alpha$ <sup>-/-</sup> and PILR- $\beta$ 1<sup>-/-</sup> PMNs in static transendothelial cell migration (TEM) assays through MDMVEC. n = 96 (WT), 54 (PILR- $\alpha$ <sup>-/-</sup>) and 41 (PILR $\beta$ 1<sup>-/-</sup>) transwells. Knockouts were compared against WT by 2-way ANOVA followed by Holm-Sidak method for multiple comparisons. (B) WT and PILR- $\alpha$ <sup>-/-</sup> PMN were allowed to transmigrate through MDMVEC for the indicated times. n = 4 transwells per time point per genotype from two experiments. Genotypes were compared by 2-tailed paired t-test. (C, D) WT and PILR- $\alpha$ <sup>-/-</sup> PMNs with either genotype fluorescently labeled were mixed and passed over TNF- $\alpha$  inflamed MDMVEC monolayers to allow transendothelial migration at 37°C for 20 min under flow, analyzed by video recording. The fraction of crawling cells (C) and the time needed for diapedesis (D) were determined. n = 14 videos for (C) and n = 31 (WT) or 15 (PILR- $\alpha$ <sup>-/-</sup>) diapedesis events for (D). Groups were compared by Mann-Whitney U-test. Error bars: SEM. \*\*p<0.01, \*\*\*p<.005, \*\*\*\*p<0.001.

DOI: <https://doi.org/10.7554/eLife.47642.052>

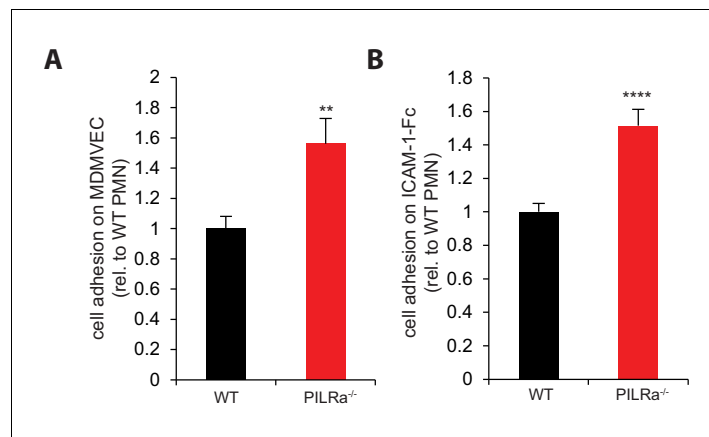

**Figure 7—figure supplement 1.** PILR- $\alpha$  suppresses adhesion on endothelial monolayers. **(A)** WT or PILR- $\alpha$ <sup>-/-</sup> PMNs were allowed to adhere onto TNF- $\alpha$  stimulated MDMVEC and adherent cells were counted.  $n = 16$  fields from two experiments. **(B)** WT or PILR- $\alpha$ <sup>-/-</sup> PMNs were allowed to adhere on ICAM-1-Fc coated surface in the presence of 100 ng/ml CXCL-1.  $n = 25$  fields from three experiments. Groups were compared by 2-tailed t-test. \*\* $p < 0.01$ , \*\*\*\* $p < 0.0001$ .

DOI: <https://doi.org/10.7554/eLife.47642.053>

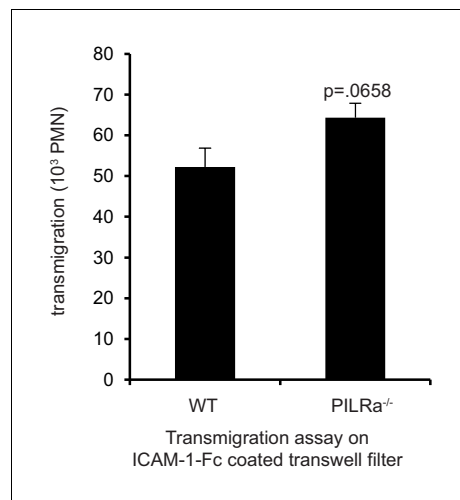

**Figure 7—figure supplement 2.** Effect of PILR- $\alpha$  on leukocyte crawling requires endothelial surface. Transmigration of WT and PILR- $\alpha^{-/-}$  PMNs towards 40 ng/ml CXCL-1 through polycarbonate transwell filters (3  $\mu$ m pore size) coated with 2  $\mu$ g/ml ICAM-1-Fc for 1 hr at 37°C. n = 6 transwells. Groups were compared by 2-tailed t-test.

DOI: <https://doi.org/10.7554/eLife.47642.057>

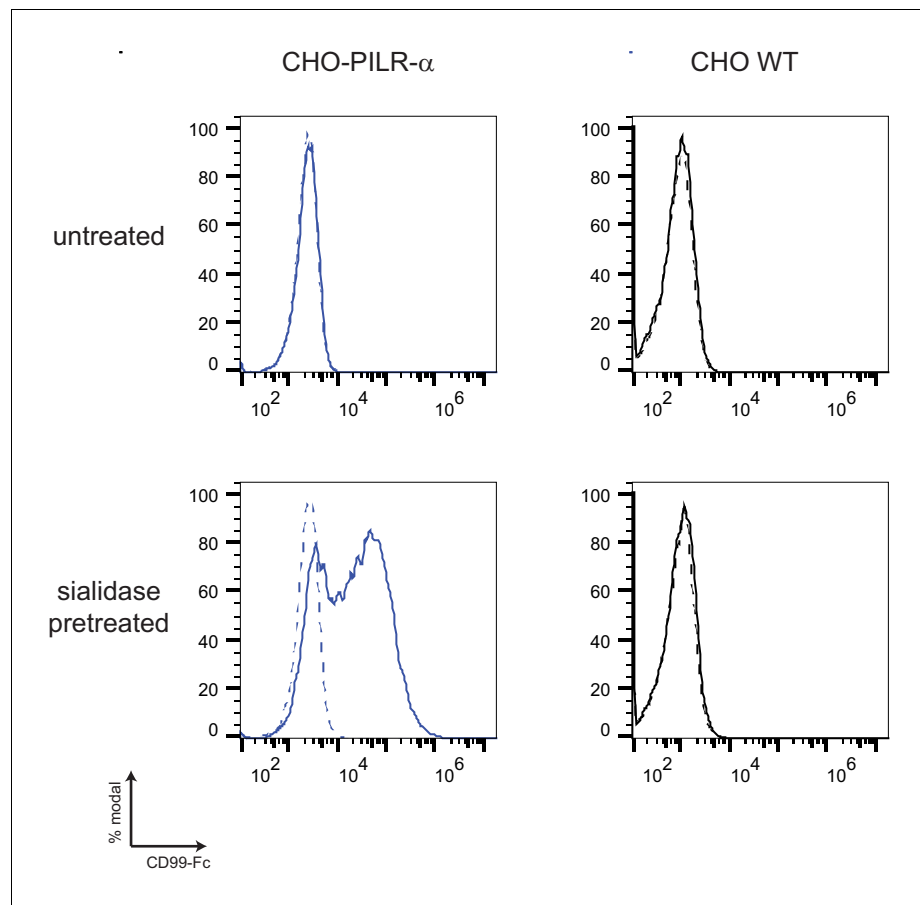

**Figure 7—figure supplement 3.** PILR- $\alpha$  on cellular surface is unavailable for CD99-Fc binding due to blockade by cis-interaction with sialylated entities. CHO- WT (black) or overexpressing PILR- $\alpha$  (CHO-PILR- $\alpha$ , blue) were treated with 0 or 0.3 U/ml sialidase at 37°C for 30 min. Cells were washed and probed for CD99-Fc binding. CD99-Fc binding on cell surface was measured by flow cytometry. Solid, CD99-Fc, dotted, control. Histograms are representative of two similar experiments.

DOI: <https://doi.org/10.7554/eLife.47642.056>

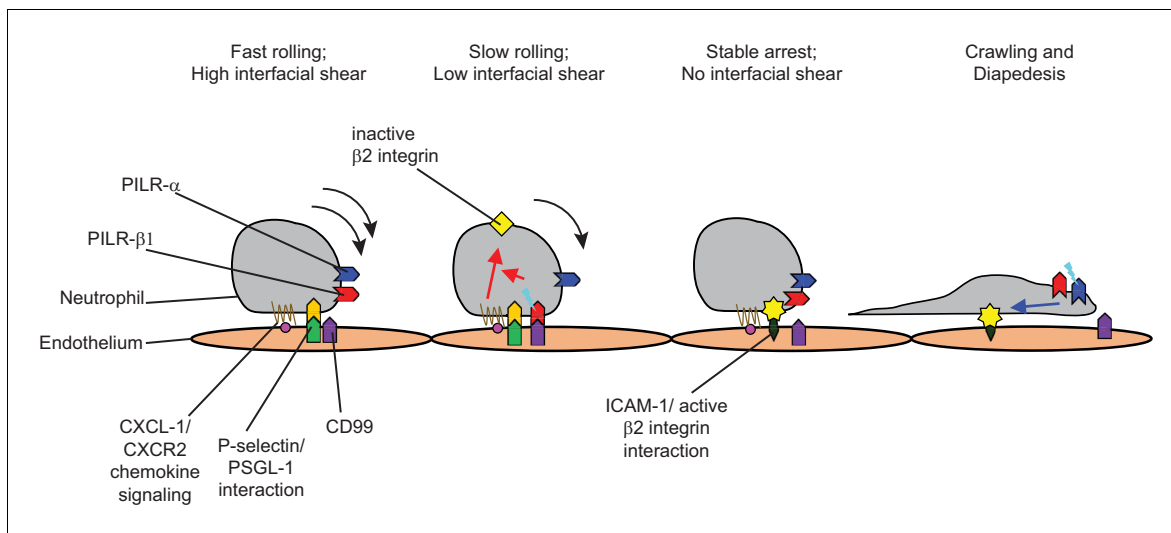

**Figure 8.** Graphical depiction. An antagonistic pair of receptors, PILR- $\beta$ 1 and PILR- $\alpha$ , supports neutrophil arrest and seamless transition to crawling via modulating  $\beta$ 2 integrin activity at different steps during extravasation.

DOI: <https://doi.org/10.7554/eLife.47642.062>
