# Supplementary figures and images for: Blood flow guides sequential support of neutrophil arrest and diapedesis by PILR-β1 and PILR-α
Source: eLife journal article supplement (doi:10.7554/elife.47642), 2019-08-06

Figure 1-figure supplement 1

**A**

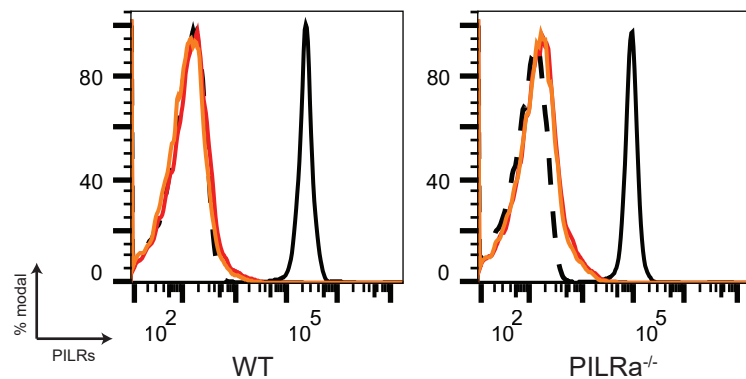

**B**

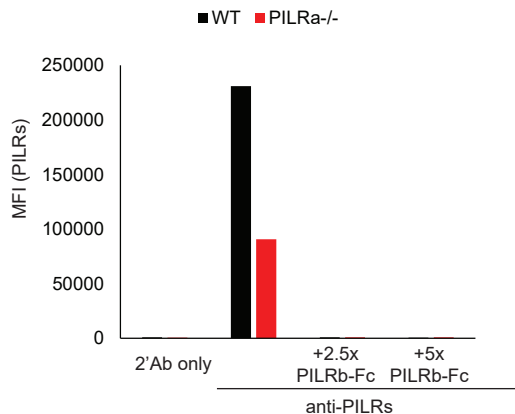

**C**

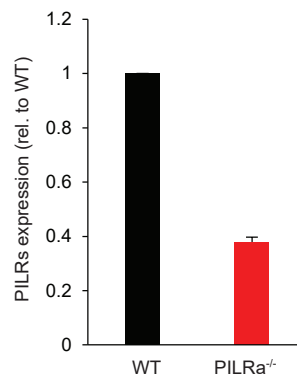

Supplement: supp [file elife_poa_e47642_Figure_1_figure_supplement_1.pdf › elife_poa_e47642_Figure_1_figure_supplement_1.pdf]

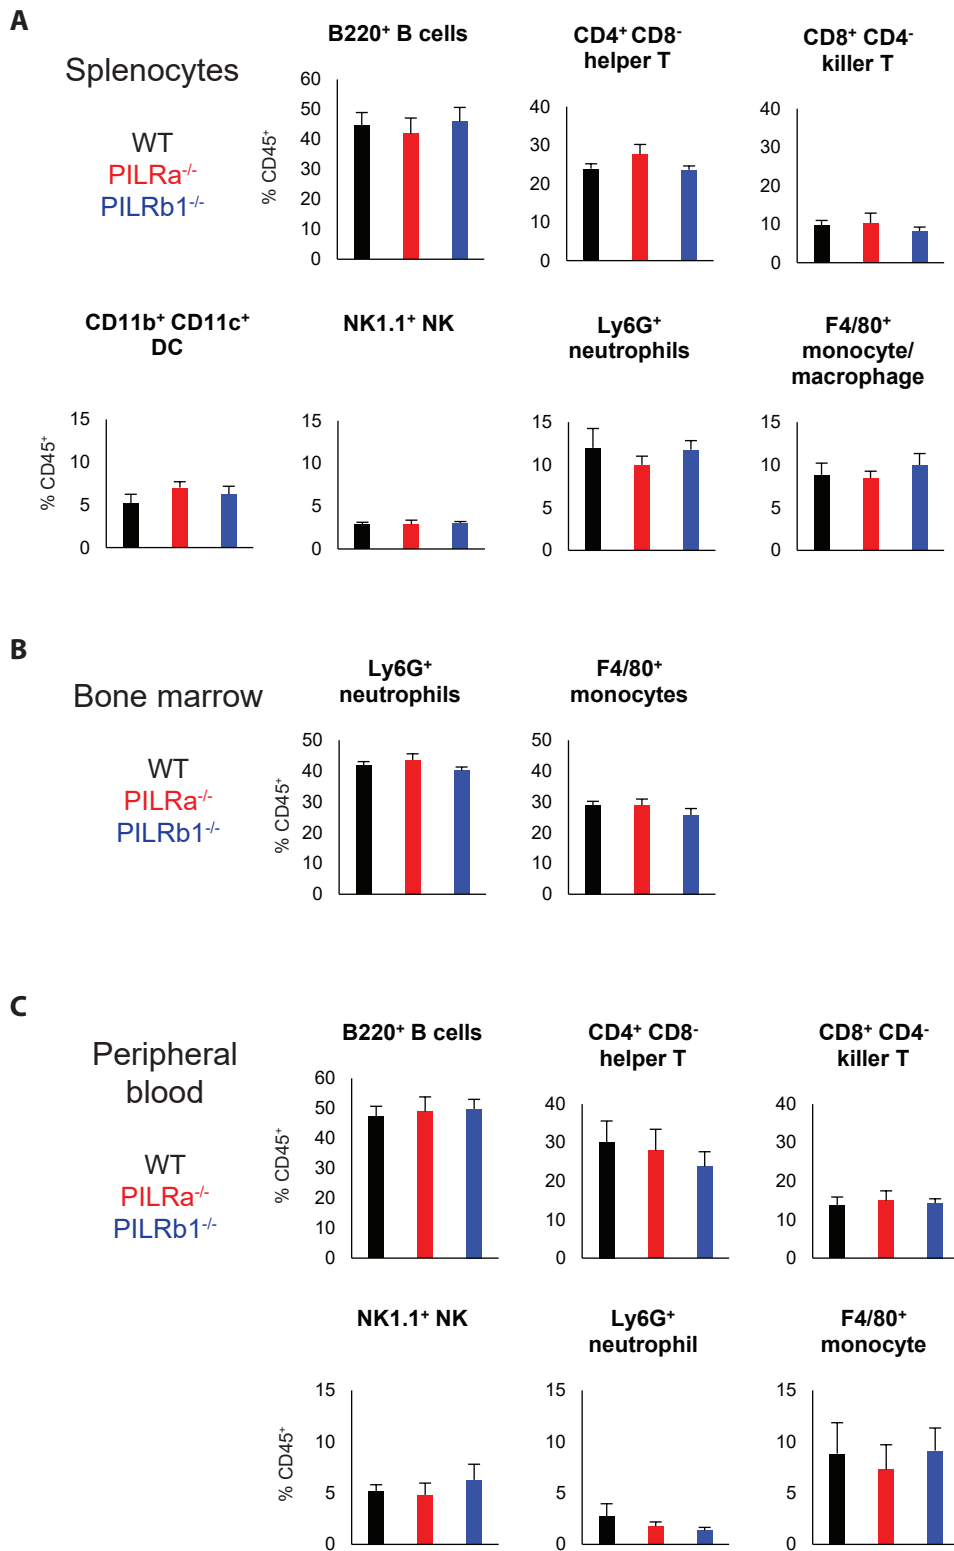

Supplement: supp [file elife_poa_e47642_Figure_1_figure_supplement_2.pdf › elife_poa_e47642_Figure_1_figure_supplement_2.pdf]

# Figure 3-figure supplement 1

**A**

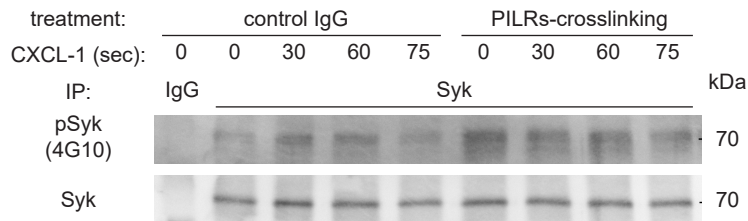

**B**

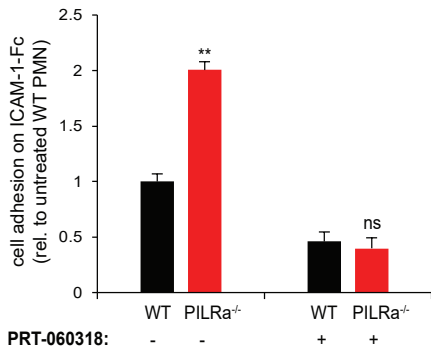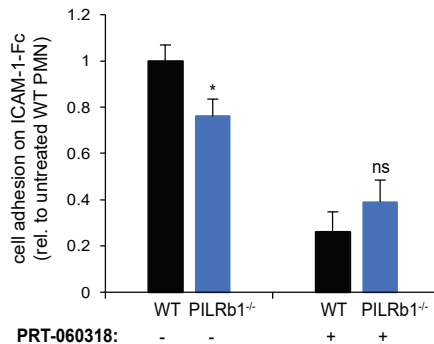

Supplement: supp [file elife_poa_e47642_Figure_3_figure_supplement_1.pdf › elife_poa_e47642_Figure_3_figure_supplement_1.pdf]

# Figure 5-figure supplement 1

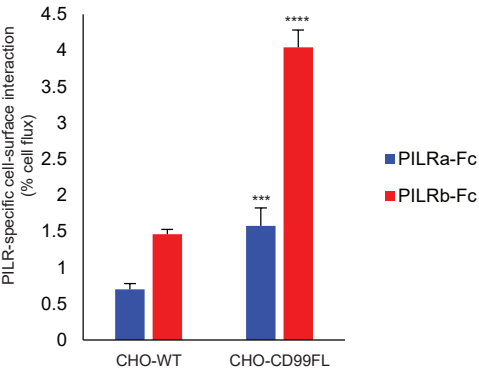

Supplement: supp [file elife_poa_e47642_Figure_5_figure_supplement_1.pdf › elife_poa_e47642_Figure_5_figure_supplement_1.pdf]

# Figure 5-figure supplement 2

**A**

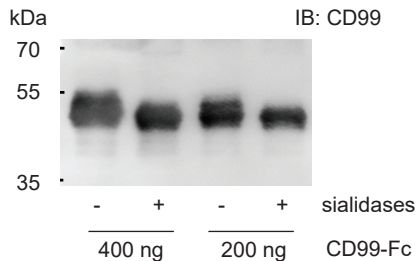

**B**

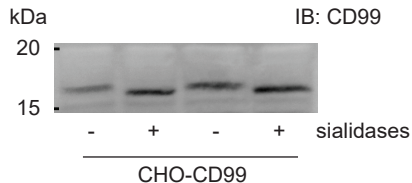

Supplement: supp [file elife_poa_e47642_Figure_5_figure_supplement_2.pdf › elife_poa_e47642_Figure_5_figure_supplement_2.pdf]

# Figure 7-figure supplement 3

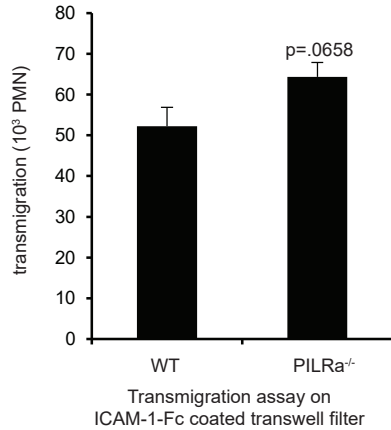

Supplement: supp [file elife_poa_e47642_Figure_7_figure_Supplement_3.pdf › elife_poa_e47642_Figure_7_figure_Supplement_3.pdf]

Figure 7-figure supplement 1

**A**

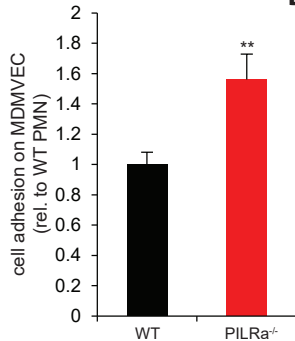

**B**

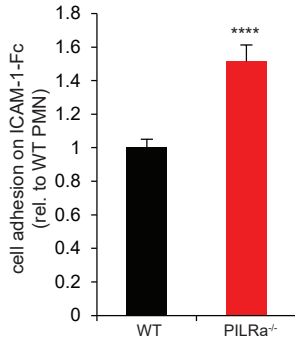

Supplement: supp [file elife_poa_e47642_Figure_7_figure_supplement_1.pdf › elife_poa_e47642_Figure_7_figure_supplement_1.pdf]

Figure 7-figure supplement 2

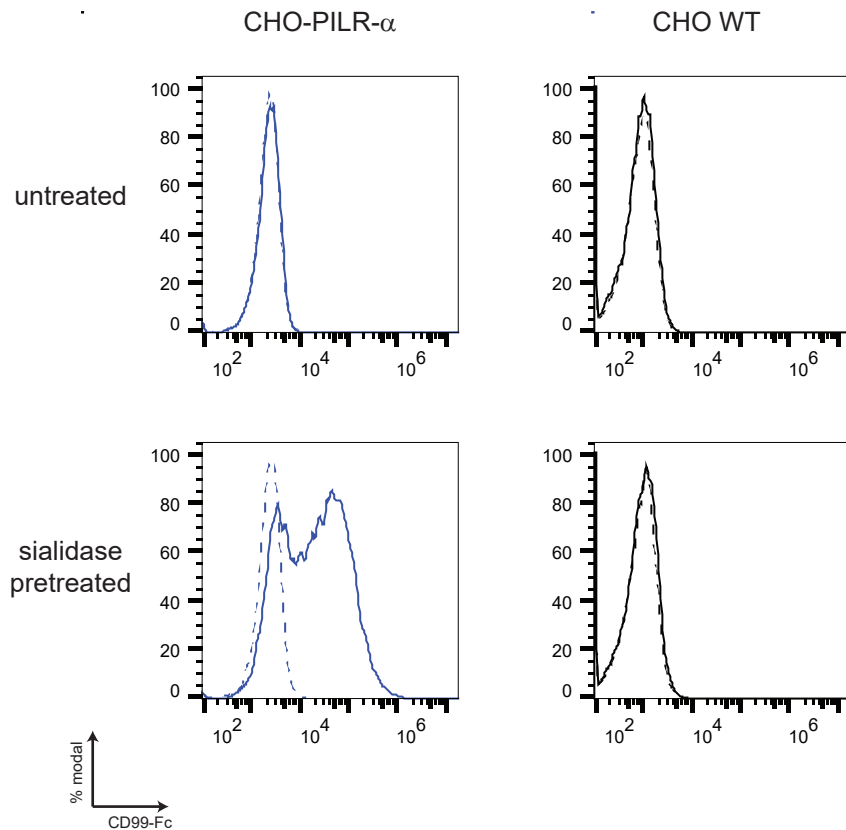

Supplement: supp [file elife_poa_e47642_Figure_7_figure_supplement_2.pdf › elife_poa_e47642_Figure_7_figure_supplement_2.pdf]
